# Supplementary material for: Profiling Plasma Cytokines by A CRISPR-ELISA Assay for Early Detection of Lung Cancer
Source: MDPI journal article supplement (doi:10.3390/jcm11236923), 2022-11-24
Supplement: s1 [file s1]

Supplementary Table S1. Day to day reproducibility of the CRSPR-ELISA assay for detection of cytokines

| Cytokines     | *CV (%) |
|---------------|---------|
| IL-1b         | 9.257   |
| IL-2          | 7.632   |
| IL-6          | 11.731  |
| IL-7          | 10.489  |
| IL-8          | 11.307  |
| IL-10         | 5.657   |
| IL-12p70      | 6.535   |
| IL-13         | 8.535   |
| IL-17A        | 5.654   |
| MCP1          | 9.554   |
| IFN- $\gamma$ | 12.455  |
| TNF- $\alpha$ | 13.646  |

\*, CV, coefficient of variation.

Supplementary Table S2. Inter-assay precision of the CRSPR-ELISA assay detection of cytokines

| Cytokines     | CV (%) |
|---------------|--------|
| IL-1b         | 11.436 |
| IL-2          | 7.652  |
| IL-6          | 12.786 |
| IL-7          | 10.685 |
| IL-8          | 9.646  |
| IL-10         | 11.864 |
| IL-12p70      | 7.656  |
| IL-13         | 6.764  |
| IL-17A        | 12.757 |
| MCP1          | 9.575  |
| IFN- $\gamma$ | 12.675 |
| TNF- $\alpha$ | 8.646  |

\*, CV, coefficient of variation.

Supplementary Table S3. Intra-assay precision of the CRSPR-ELISA assay detection of cytokines

| Cytokines     | CV (%) |
|---------------|--------|
| IL-1b         | 8.127  |
| IL-2          | 10.468 |
| IL-6          | 7.965  |
| IL-7          | 11.654 |
| IL-8          | 7.544  |
| IL-10         | 9.945  |
| IL-12p70      | 10.435 |
| IL-13         | 6.674  |
| IL-17A        | 13.854 |
| MCP1          | 11.468 |
| IFN- $\gamma$ | 9.945  |

---

TNF- $\alpha$

11.673

---

\*, CV, coefficient of variation.
